# Supplementary material for: Plant species-dependent transformation and translocation of ceria nanoparticles
Source: Royal Society of Chemistry journal article supplement (doi:10.1039/c8en01089g), 2018-11-13
Supplement: c8en01089g1.pdf [file c8en01089g1.pdf]

## Supplementary Information

### **Plant Species Dependant Transformation and Translocation of Ceria Nanoparticles**

Peng Zhang,<sup>\*,a,b</sup> Yuhui Ma,<sup>a</sup> Changjian Xie,<sup>a</sup> Zhiling Guo,<sup>b</sup> Xiao He,<sup>a</sup> Eugenia Valsami-Jones,<sup>b</sup> Iseult Lynch,<sup>b</sup> Wenhe Luo,<sup>a</sup> Lirong Zheng,<sup>c</sup> Zhiyong Zhang<sup>\*,a</sup>

<sup>a</sup>Key Laboratory for Biological Effects of Nanomaterials and Nanosafety, Institute of High Energy Physics, Chinese Academy of Sciences, Beijing 100049, China

<sup>b</sup>School of Geography, Earth and Environmental Sciences, University of Birmingham, Birmingham, B15 2TT, United Kingdom

<sup>c</sup>Beijing Synchrotron Radiation Facility, Institute of High Energy Physics, Chinese Academy of Sciences, Beijing 100049, China

\*Corresponding Authors: Peng Zhang, e-mail: pengzhang@ihep.ac.cn, p.zhang.1@bham.ac.uk, telephone: +86-10-88233215, fax: +86-10-88235294; Zhiyong Zhang, e-mail: zhangzhy@ihep.ac.cn.

## FIGURES AND TABLES

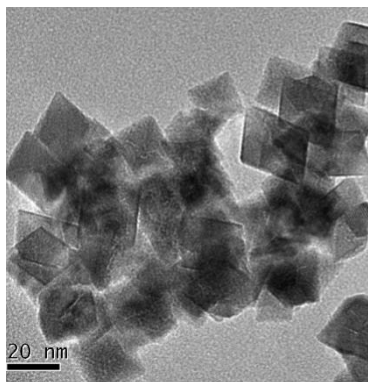

**Figure S1.** TEM image of nCeO<sub>2</sub>. Size averaged from 100 particles in the TEM images is  $25 \pm 4$  nm, and shape is octahedral.

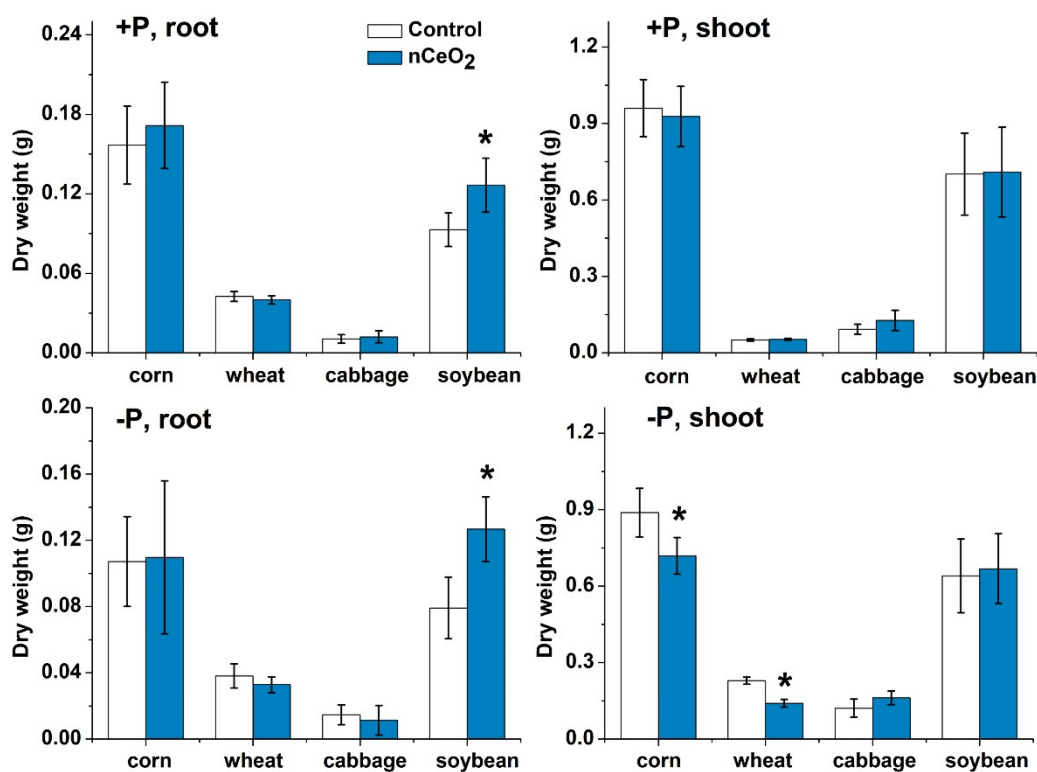

**Figure S2.** Dry weight of the plants treated with 2000 mg/L nCeO<sub>2</sub> in hydroponic solution. \* indicates significant difference between control and nCeO<sub>2</sub> treatment. Data are expressed as mean  $\pm$  SD ( $n = 8$ ). \* indicates significant difference between +P and -P treatment ( $p < 0.05$ ).

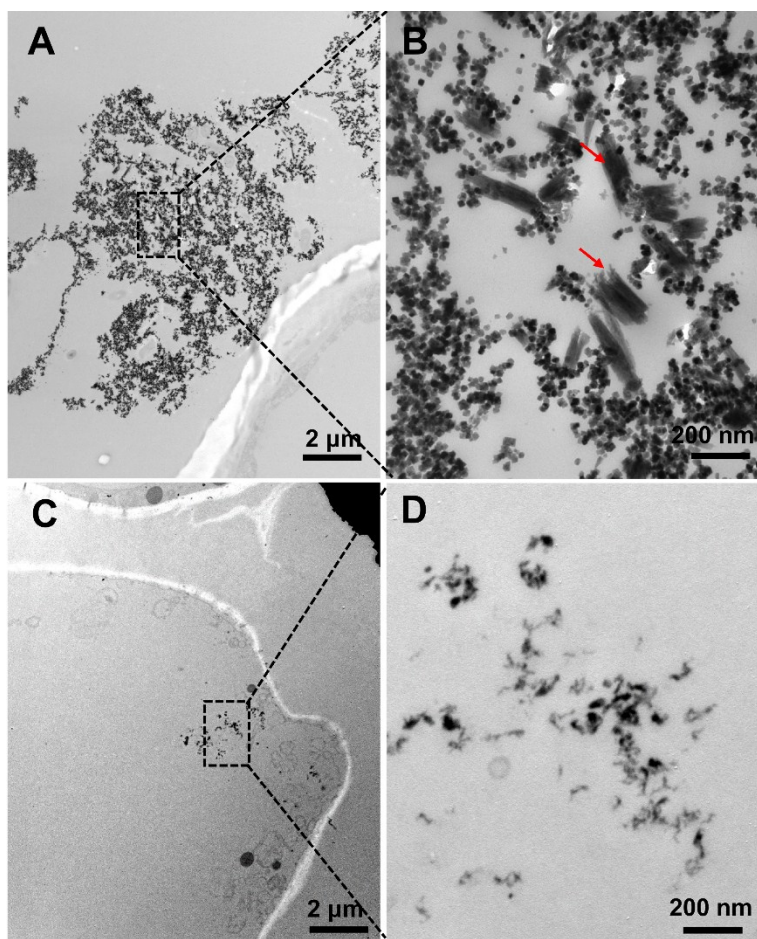

**Figure S3.** TEM images of corn roots. (A) and (B) show the root surface, (C) and (D) show the inside of a single cell. (B) and (D) are magnifications of the areas highlighted in the rectangles in (A) and (C).

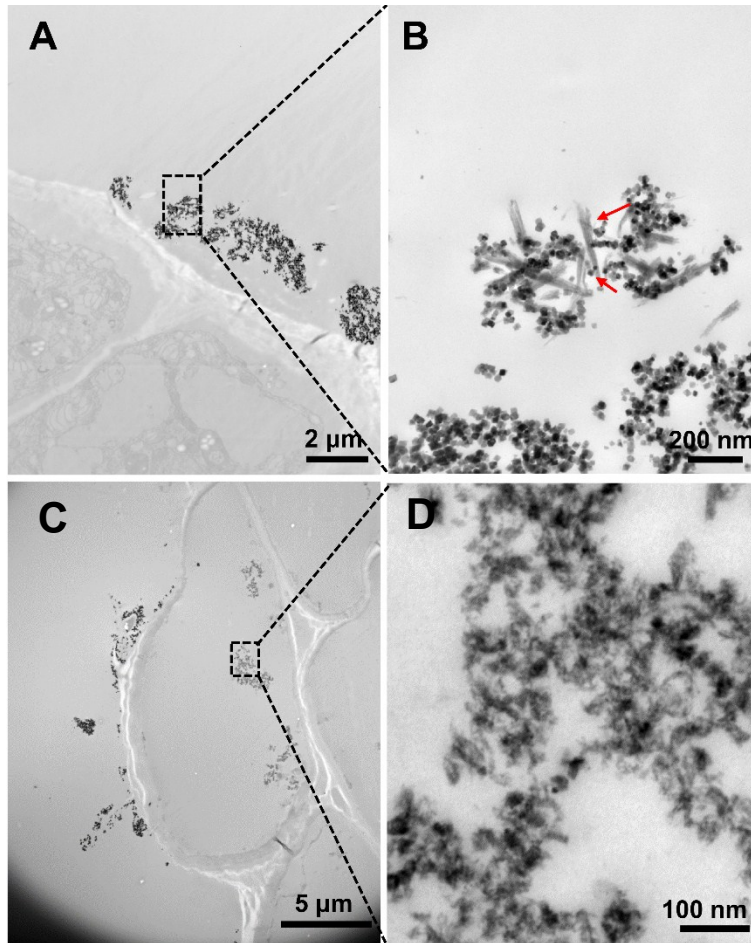

**Figure S4.** TEM images of wheat roots. (A) and (B) show the root surface, (C) and (D) show the inside of a single cell. (B) and (D) are magnifications of the areas highlighted in the rectangles in (A) and (C).

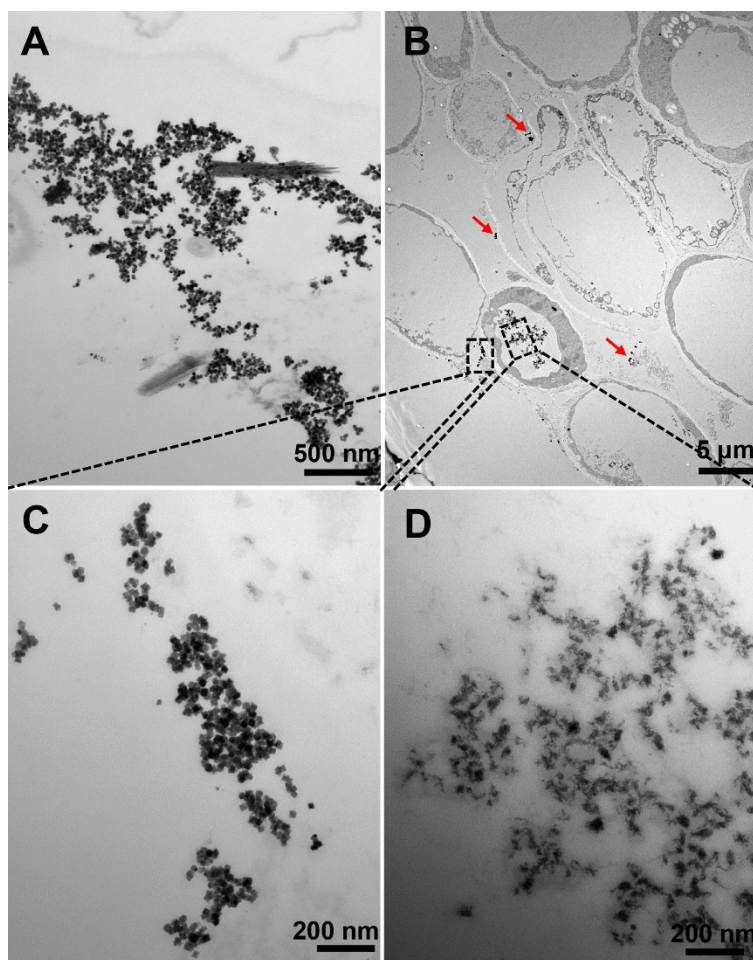

**Figure S5.** TEM images of soybean roots. (A) shows the root surface, (B) shows a low magnification image of the root section, (C) and (D) are magnifications of the areas highlighted in the rectangles in (B). Arrows in (B) indicate the  $\text{nCeO}_2$  aggregates.



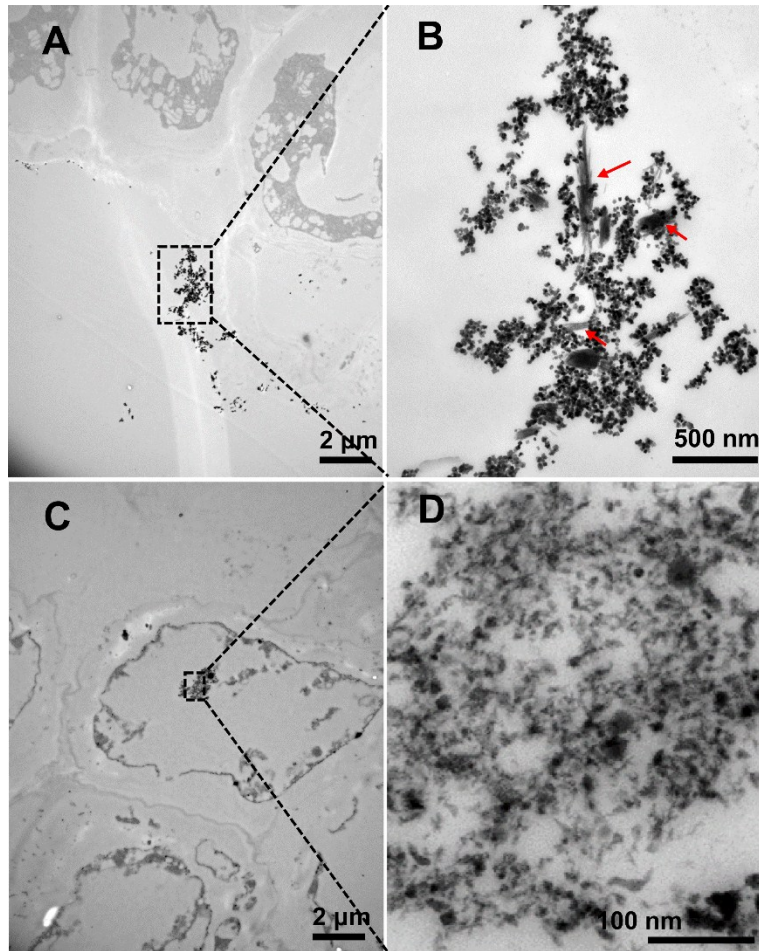

**Figure S6.** TEM images of cabbage roots. (A) and (B) show the root surface, (C) and (D) show the inside of a single cell. (B) and (D) are magnifications of the areas highlighted in the rectangles in (A) and (C). Arrows in (B) indicate the rod like particles.

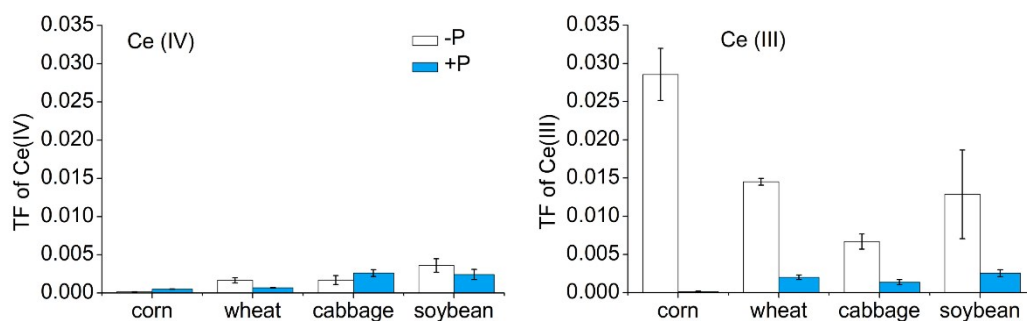

**Figure S7.** Translocation factors of Ce(IV) and Ce(III) in different plant species.

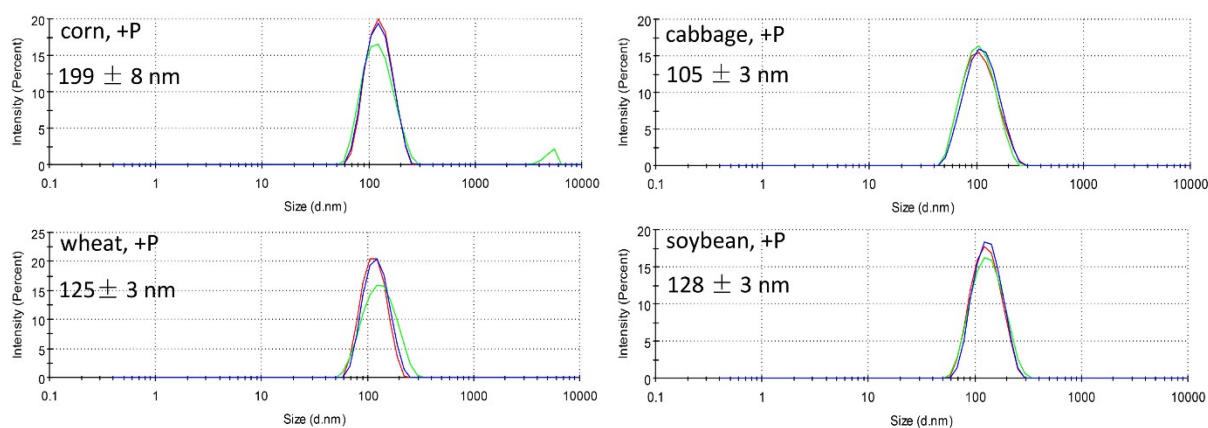

**Figure S8.** Size distributions of nCeO<sub>2</sub> (100 mg/L) in root exudates extracted from plants cultured in the +P condition.

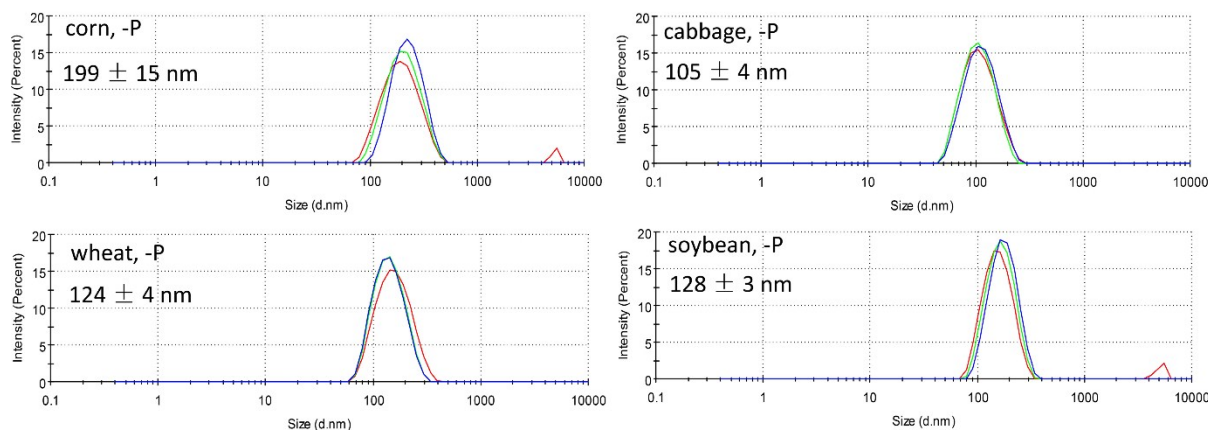

**Figure S9.** Size distributions of nCeO<sub>2</sub> in root exudates extracted from plants cultured in the -P condition.

**Table S1.** Hydrodynamic sizes and Zeta potential of nCeO<sub>2</sub> (100 mg/L) in deionized water (ddH<sub>2</sub>O) and nutrient solutions (NS).

|                     | Hydrodynamic sizes | Zeta potentials (mV) |
|---------------------|--------------------|----------------------|
| dd H <sub>2</sub> O | 135 ± 24           | 30.6 ± 5.1           |
| +P NS               | 1578 ± 240         | -8.9 ± 4.0           |
| -P NS               | 1367± 198          | -7.1 ± 3.2           |

**Table S2.** Fraction of Ce species in roots and fitting parameters from LCF analysis.

| Root (%)   | CeO <sub>2</sub> | Ce(CH <sub>3</sub> COO) <sub>3</sub> | Ce <sub>2</sub> (C <sub>2</sub> O <sub>4</sub> ) <sub>3</sub> | CePO <sub>4</sub> | R-factor | Chi-square |
|------------|------------------|--------------------------------------|---------------------------------------------------------------|-------------------|----------|------------|
| +P-corn    | 82               |                                      | 2.4                                                           | 15.6              | 0.000040 | 0.00656    |
| -P-corn    | 92.4             |                                      | 5.3                                                           | 2.3               | 0.000785 | 0.01326    |
| +P-wheat   | 91.2             |                                      | 2.3                                                           | 6.5               | 0.000428 | 0.06281    |
| -P-wheat   | 85.1             |                                      | 10.8                                                          | 4.1               | 0.004597 | 0.00114    |
| +P-cabbage | 82.1             |                                      | 5.5                                                           | 12.4              | 0.000333 | 0.05219    |
| -P-cabbage | 74.1             |                                      | 19.5                                                          | 6.4               | 0.000117 | 0.01780    |
| +P-soybean | 92.2             |                                      | 0.7                                                           | 7.1               | 0.000123 | 0.02181    |
| -P-soybean | 83.2             |                                      | 11.7                                                          | 5.1               | 0.000152 | 0.02343    |

**Table S3.** Fraction of Ce species in shoots and fitting parameters from LCF analysis.

| Shoot (%)  | CeO <sub>2</sub> | Ce(CH <sub>3</sub> COO) <sub>3</sub> | Ce <sub>2</sub> (C <sub>2</sub> O <sub>4</sub> ) <sub>3</sub> | CePO <sub>4</sub> | R-factor | Chi-square |
|------------|------------------|--------------------------------------|---------------------------------------------------------------|-------------------|----------|------------|
| +P-corn    | 94.7             | 0.9                                  | 4.4                                                           |                   | 0.00271  | 0.0305     |
| -P-corn    | 6.7              |                                      | 93.3                                                          |                   | 0.00151  | 0.0206     |
| +P-wheat   | 78.2             |                                      | 21.6                                                          |                   | 0.00212  | 0.0281     |
| -P-wheat   | 39.5             |                                      | 60.5                                                          |                   | 0.00110  | 0.0140     |
| +P-cabbage | 89.7             | 0.8                                  | 9.5                                                           |                   | 0.00007  | 0.0008     |
| -P-cabbage | 42.1             |                                      | 57.9                                                          |                   | 0.00176  | 0.0219     |
| +P-soybean | 91.8             |                                      | 8.2                                                           |                   | 0.00213  | 0.0281     |
| -P-soybean | 58.1             |                                      | 43.3                                                          |                   | 0.00250  | 0.0343     |

**Table S4.** Contents of Ce(IV) and Ce(III) species (mg/kg) in shoots and roots of plants calculated



by multiplying the percentage of the Ce(IV) or Ce(III) species by the total Ce contents.

|       |         | Ce(IV)   |          | Ce(III)  |          |
|-------|---------|----------|----------|----------|----------|
|       |         | -P       | +P       | -P       | +P       |
| shoot | corn    | 10.61    | 5.27     | 147.74   | 0.29     |
|       | wheat   | 55.43    | 21.83    | 84.89    | 6.09     |
|       | cabbage | 73.47    | 67.69    | 101.03   | 7.77     |
|       | soybean | 104.96   | 70.46    | 75.69    | 6.29     |
| root  | corn    | 62918.28 | 10249.75 | 5175.097 | 2249.945 |
|       | wheat   | 33418.26 | 31301.83 | 5851.14  | 3020.352 |
|       | cabbage | 43211.62 | 25794.26 | 15103.66 | 5623.84  |
|       | soybean | 29122.64 | 29068.46 | 5880.533 | 2459.154 |

**Table S5.** Zeta potential of nCeO<sub>2</sub> (100 mg/L) in root exudates extracted from plants cultured in the +P and –P conditions.

|    | Corn        | Wheat       | Cabbage   | Soybean   |
|----|-------------|-------------|-----------|-----------|
| +P | -16.1 ± 2.2 | -15.5 ± 2.5 | -21.4 ± 4 | -18.7 ± 1 |
| -P | -18.6 ± 2.1 | -12.9 ± 1.2 | -20.4 ± 5 | -19.1 ± 2 |
